# Supplementary material for: Single-Layer GaInSe3: Promising Water-Splitting Photocatalyst with Solar Conversion Efficiency over 30% from Theoretical Calculations
Source: MDPI journal article supplement (doi:10.3390/molecules28196858), 2023-09-28
Supplement: s1 [file s1]

Article

# Single-Layer GaInSe<sub>3</sub>: Promising Water-Splitting Photocatalyst with Solar Conversion Efficiency Over 30% from Theoretical Calculations

Li-Li Liu <sup>1,2,\*</sup>, Ru-Fei Tang <sup>1</sup>, De-Fen Li <sup>1</sup>, Ming-Xia Tang <sup>1</sup>, Bing-Zhong Mu <sup>1</sup>, Zheng-Quan Hu <sup>3</sup>, Shi-Fa Wang <sup>3</sup>, Yu-Feng Wen <sup>4,\*</sup> and Xiao-Zhi Wu <sup>2,\*</sup>

<sup>1</sup> College of Teacher Education, Chongqing Three Gorges University, Chongqing 404100, China; TangRFsanxu@163.com (R.-F.T.); LiDFsanxu@163.com (D.-F.L.); tangmxsanxu@163.com (M.-X.T.); m15213132982@163.com (B.-Z.M.)

<sup>2</sup> Institute for Structure and Function, Chongqing University, Chongqing 401331, China; xiaozhiwu@cqu.edu.cn

<sup>3</sup> College of Electronic and Information Engineering, Chongqing Three Gorges University, Chongqing 404100, China; hzq250314@163.com (Z.-Q.H.); wangshifa2006@yeah.net (S.-F.W.)

<sup>4</sup> School of Mathematical Sciences and Physics, Jinggangshan University, Ji'an 343009, China

\* Correspondence: liulili0612@163.com (L.-L.L.); wenyufeng@jgsu.edu.cn (Y.-F.W.)

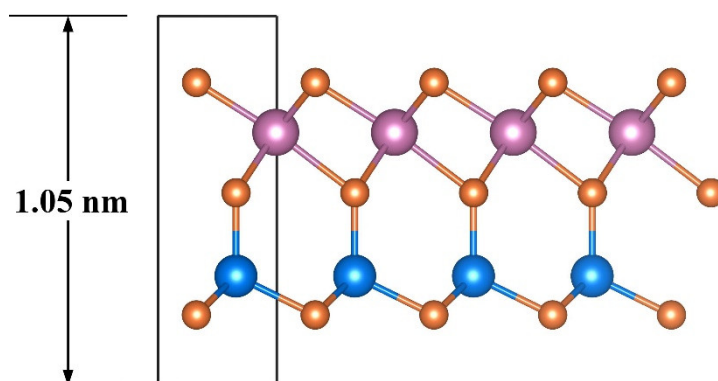

**Figure S1.** The assumed bulk GaInSe<sub>3</sub> crystal containing one GaInSe<sub>3</sub> layer.

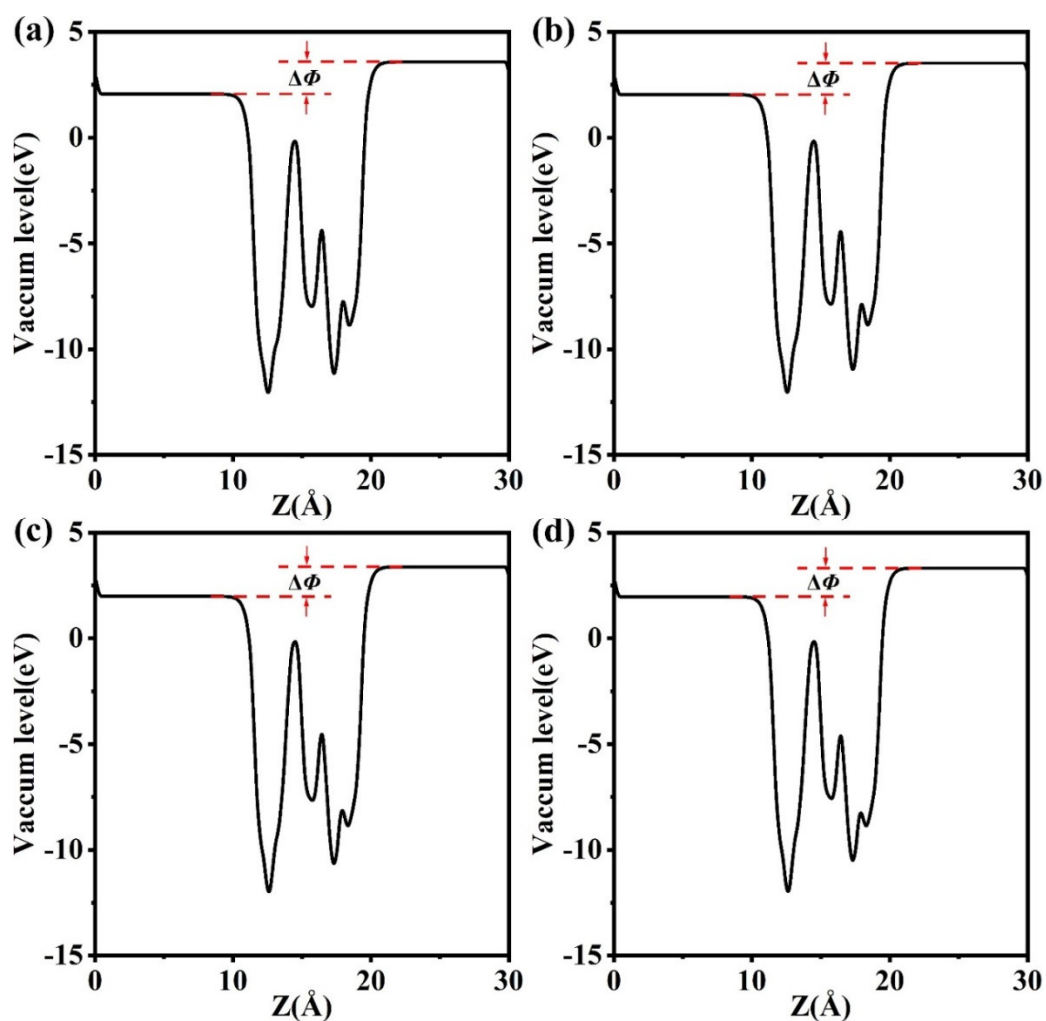

**Figure S2.** The vacuum level difference of single-layer GaInSe<sub>3</sub> under the biaxial strains of (a) -2%, (b) -1%, (c) +1%, and (d) +2%.

The vacuum level differences of single-layer GaInSe<sub>3</sub> under the biaxial strains from -2% to +2% between top and bottom surfaces are listed in Table S1.

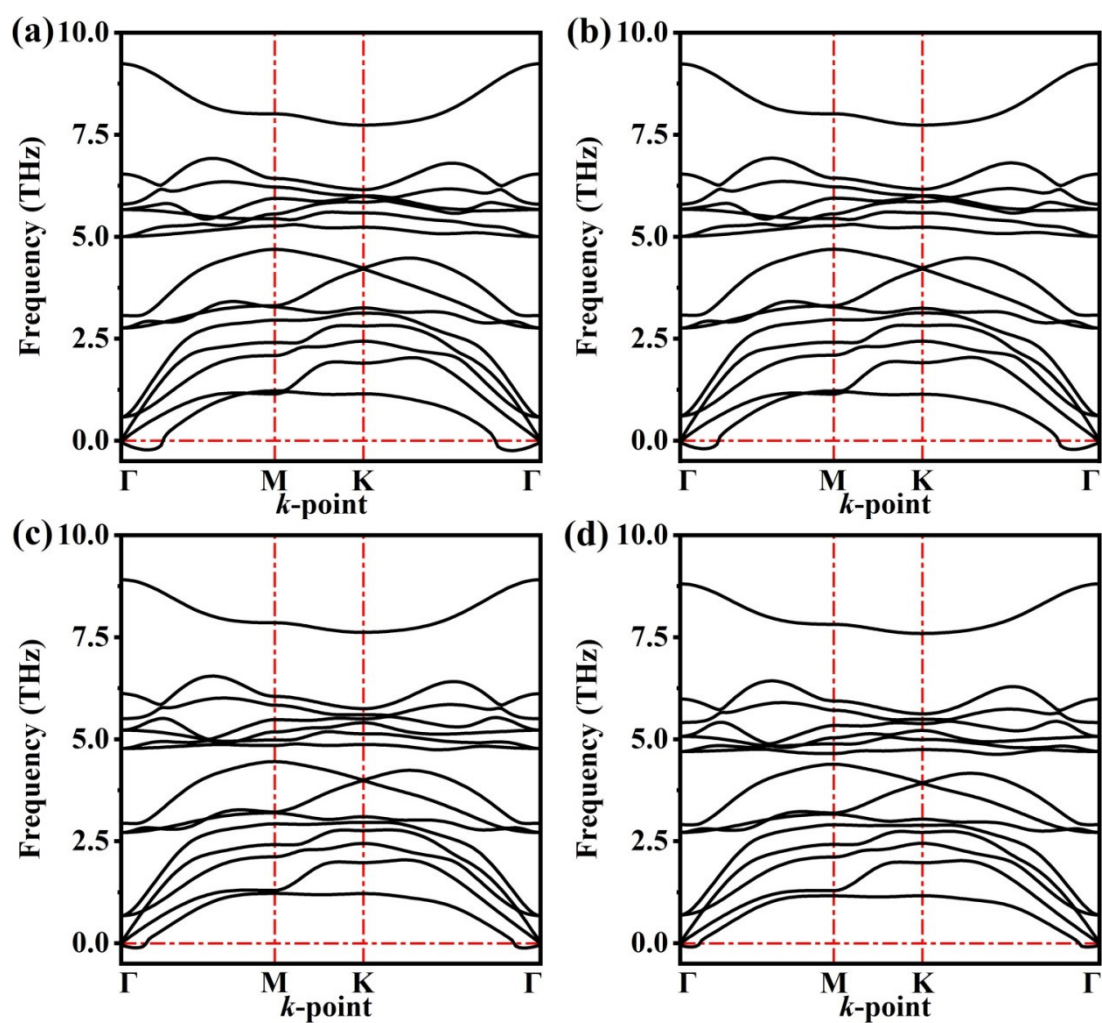

**Figure S3.** The phonon dispersion curve of single-layer GaInSe<sub>3</sub> under the biaxial strains of (a) -2%, (b) -1%, (c) +1%, and (d) +2%.

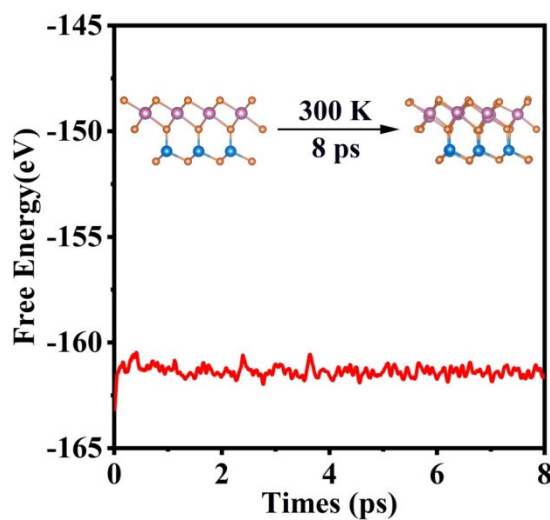

Figure S4. The thermal stability of unstrained single-layer GaInSe<sub>3</sub>.

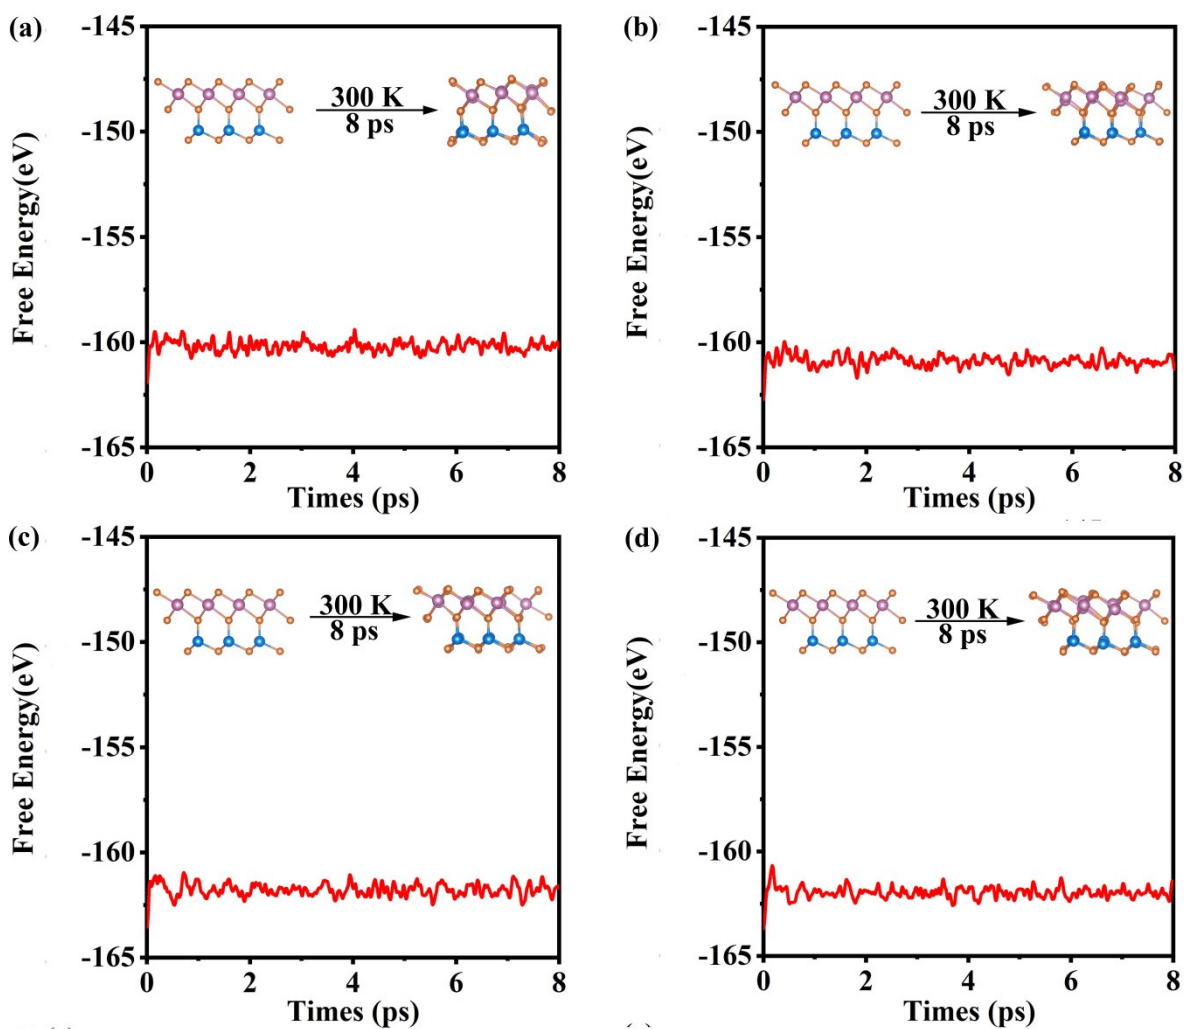

Figure S5. The snapshots of single-layer GaInSe<sub>3</sub> under the biaxial strains of (a) -2%, (b) -1%, (c) +1%, (d) +2% under before and after AIMD simulations at 300 K.

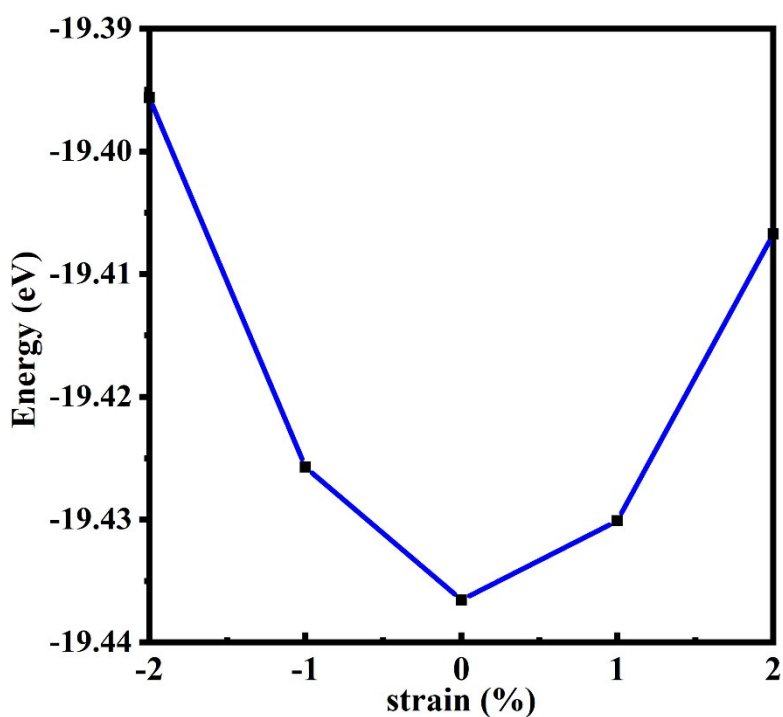

Figure S6. The total energy under the considered strains.

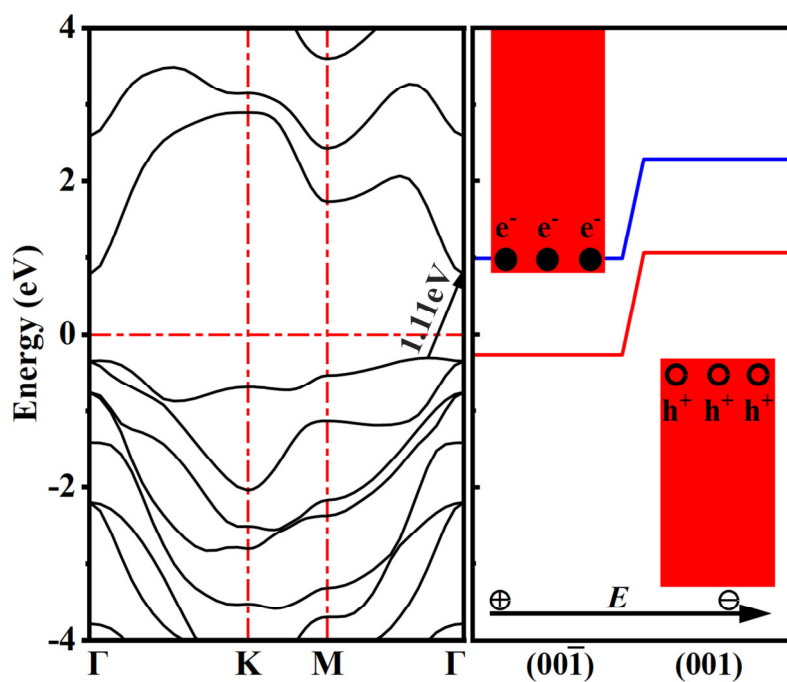

Figure S7. The band structure and the band alignment of single-layer GaInSe<sub>3</sub> under the biaxial strain of +2% calculated using HSE06.

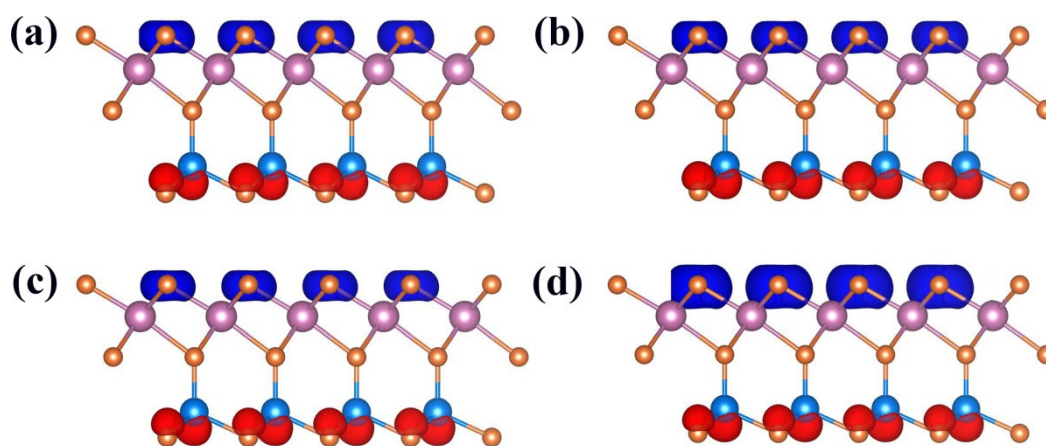

**Figure S8.** The spatial distribution of CBM (red) and VBM (blue) of single-layer GaInSe<sub>3</sub> under the biaxial strains of (a) -2%, (b) -1%, (c) +1%, and (d) +2%.

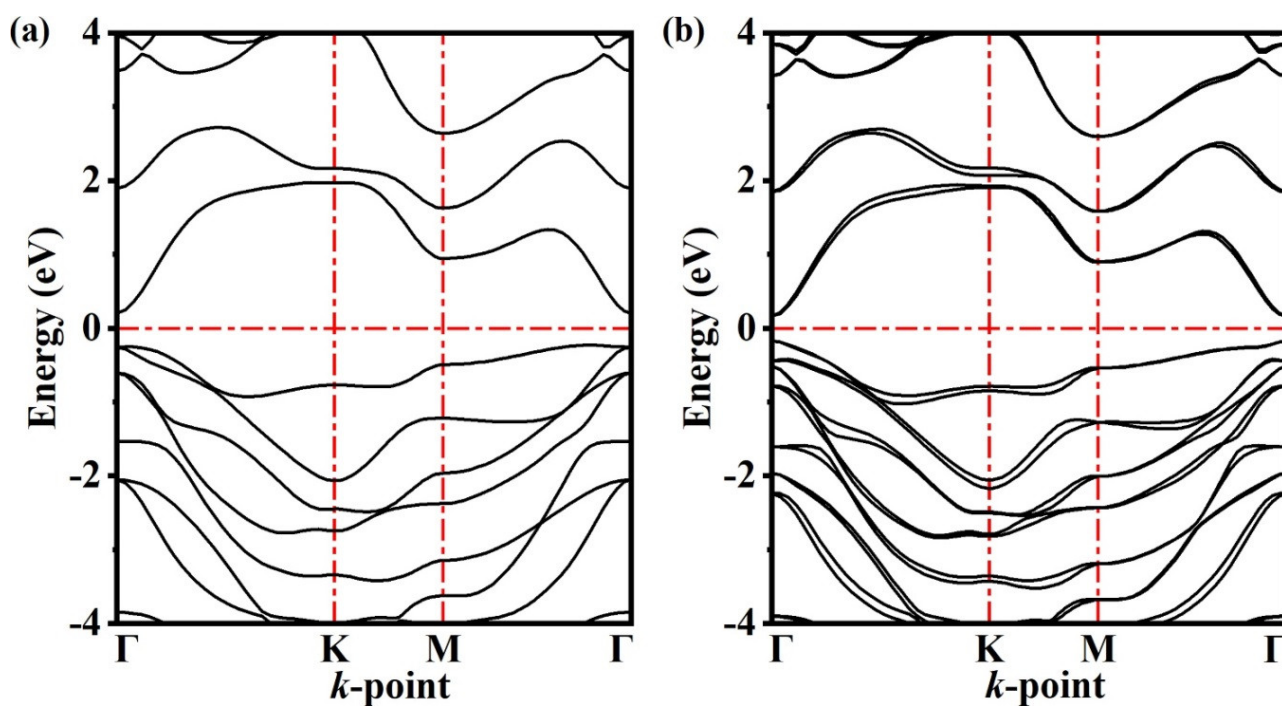

**Figure S9.** The band structures of unstrained single-layer GaInSe<sub>3</sub> at the (a) PBE and (b) PBE+SOC level.

As usual cases, one band is splitting into two bands when the SOC is included. Notably, the band splitting is not apparent, and especially it is negligible for the top valence band and the bottom conduction band. Thus, the SOC can be ignored when exploring the electronic structure of single-layer GaInSe<sub>3</sub>.

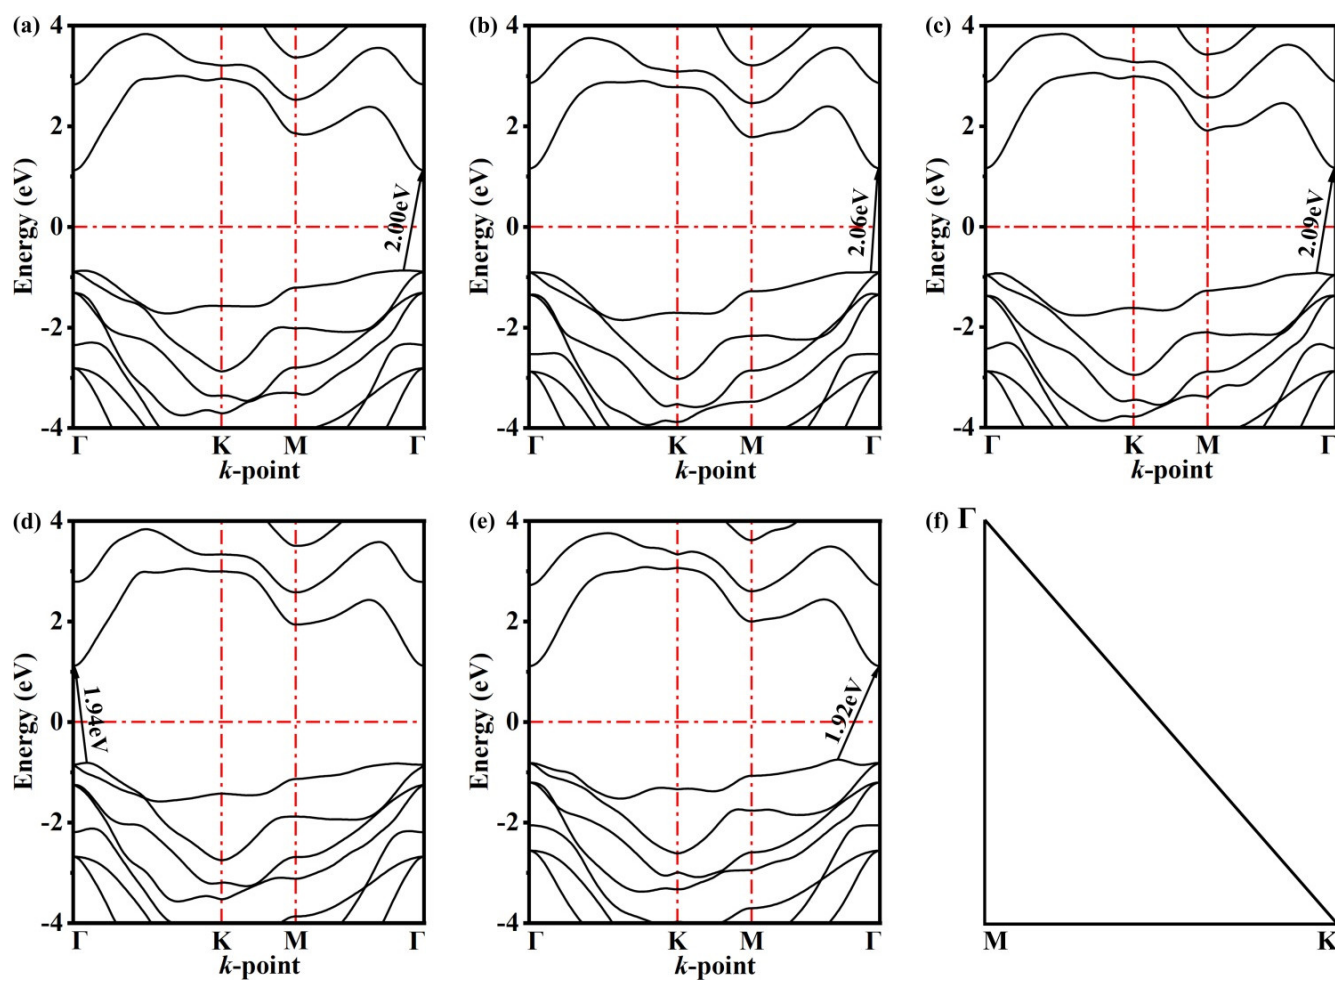

**Figure S10.** The band structures of single-layer GaInSe<sub>3</sub> under the biaxial strains of (a) -2%, (b) -1%, (c) 0%, (d) +1%, (e) +2% calculated at the  $G_0W_0$ , and (f) the 2D Brillouin Zone.

The bandgaps could be overestimated due to the inclusion of excitonic effects. Hence, the  $G_0W_0$  bands are not discussed.

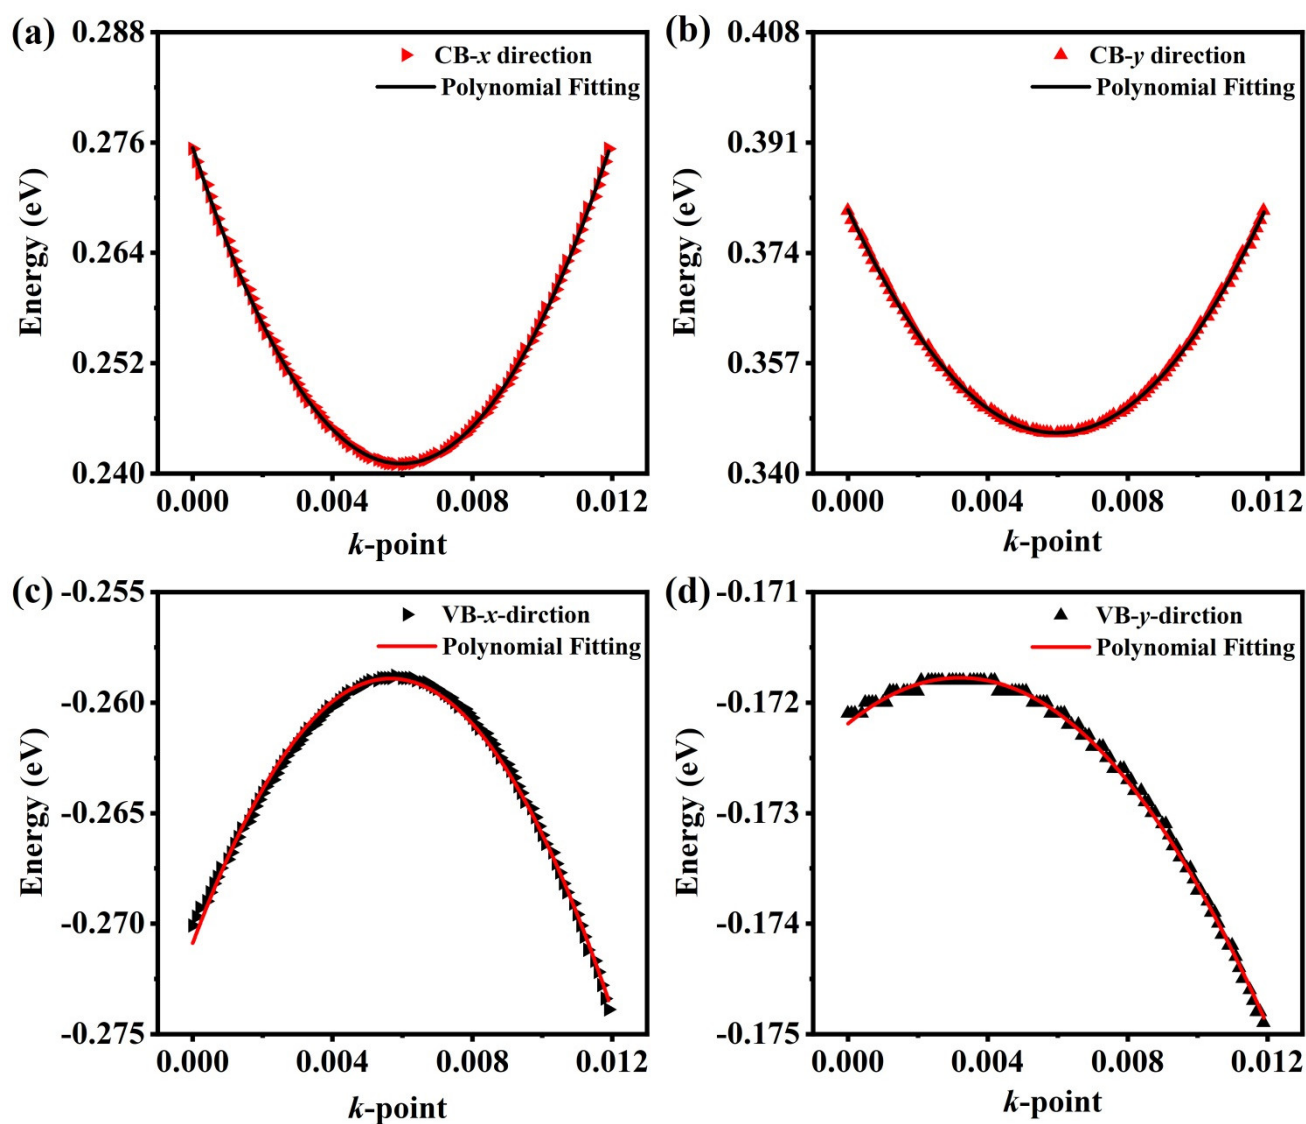

**Figure S11.** The quadratic fitting between the energy near the CBM (VBM) and  $k$ -point along the x and y directions under the biaxial strain of -2%.

According to the DP theory, the effective mass  $m^*$  is obtained by the quadratic fitting between the energy near the CBM (VBM) and the  $k$ -point.

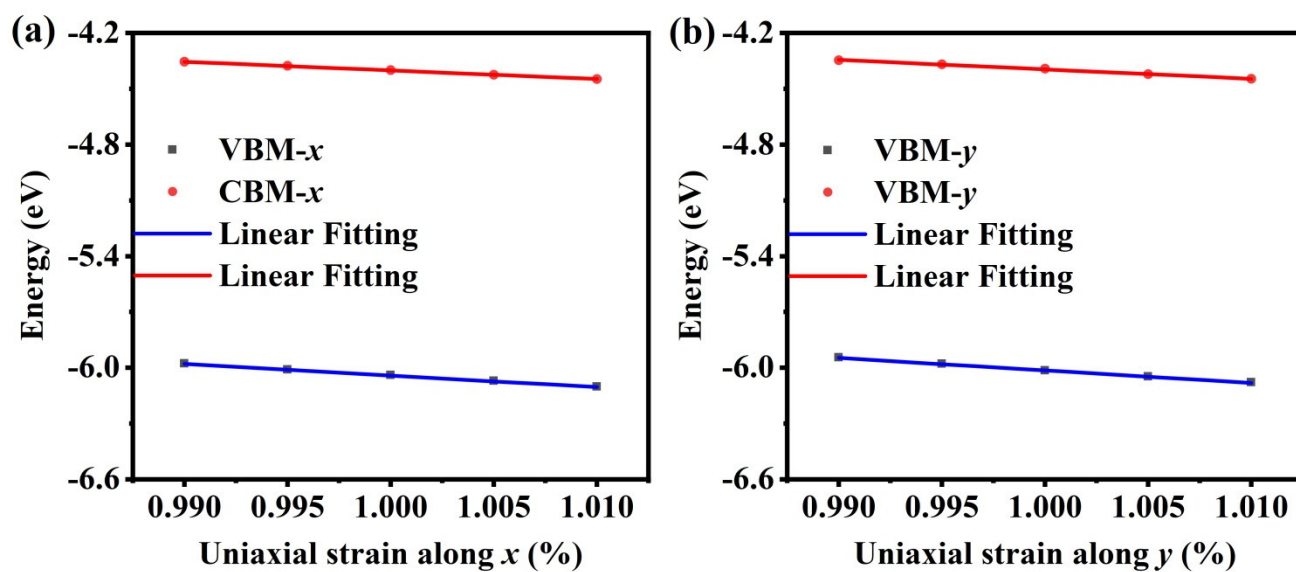

**Figure S12.** The linear fitting for the deformation potential constants along the x and y directions of single-layer GaInSe<sub>3</sub> under the biaxial strain of -2%.

According to the DP theory, the deformation potential constant is calculated based on the linear fitting between the energy of CBM (VBM) and the uniaxial strain.

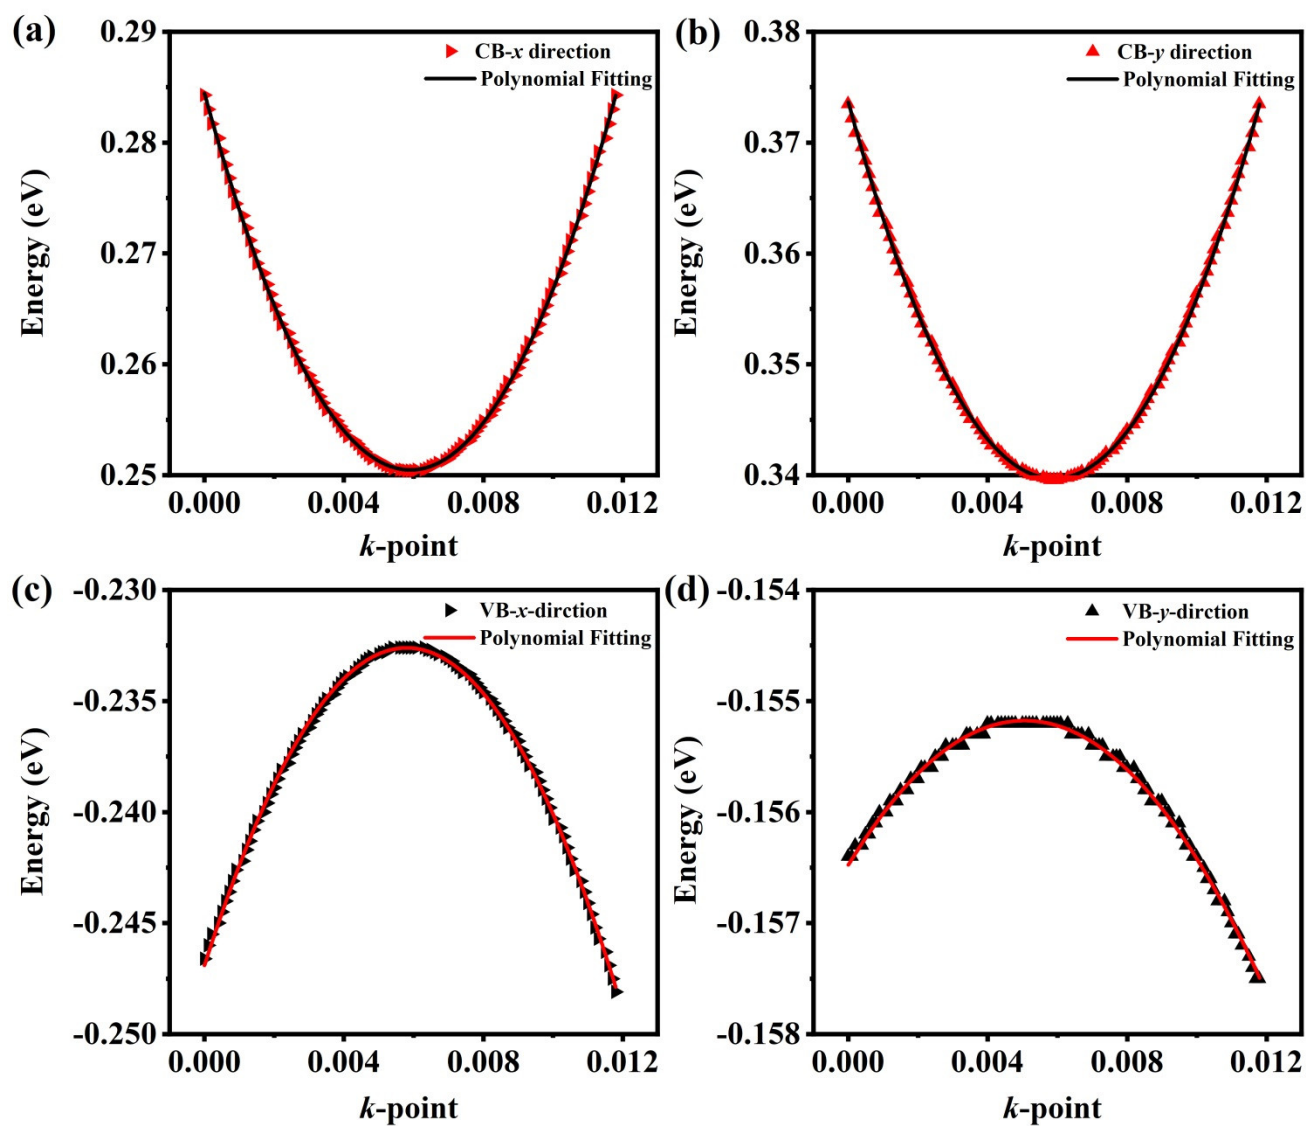

**Figure S13.** The quadratic fitting between the energy near the CBM (VBM) and k-point along the x and y directions under the biaxial strain of -1%.



Figure S14. The linear fitting for the deformation potential constants along the x and y directions of single-layer GaInSe<sub>3</sub> under the biaxial strain of -1%.

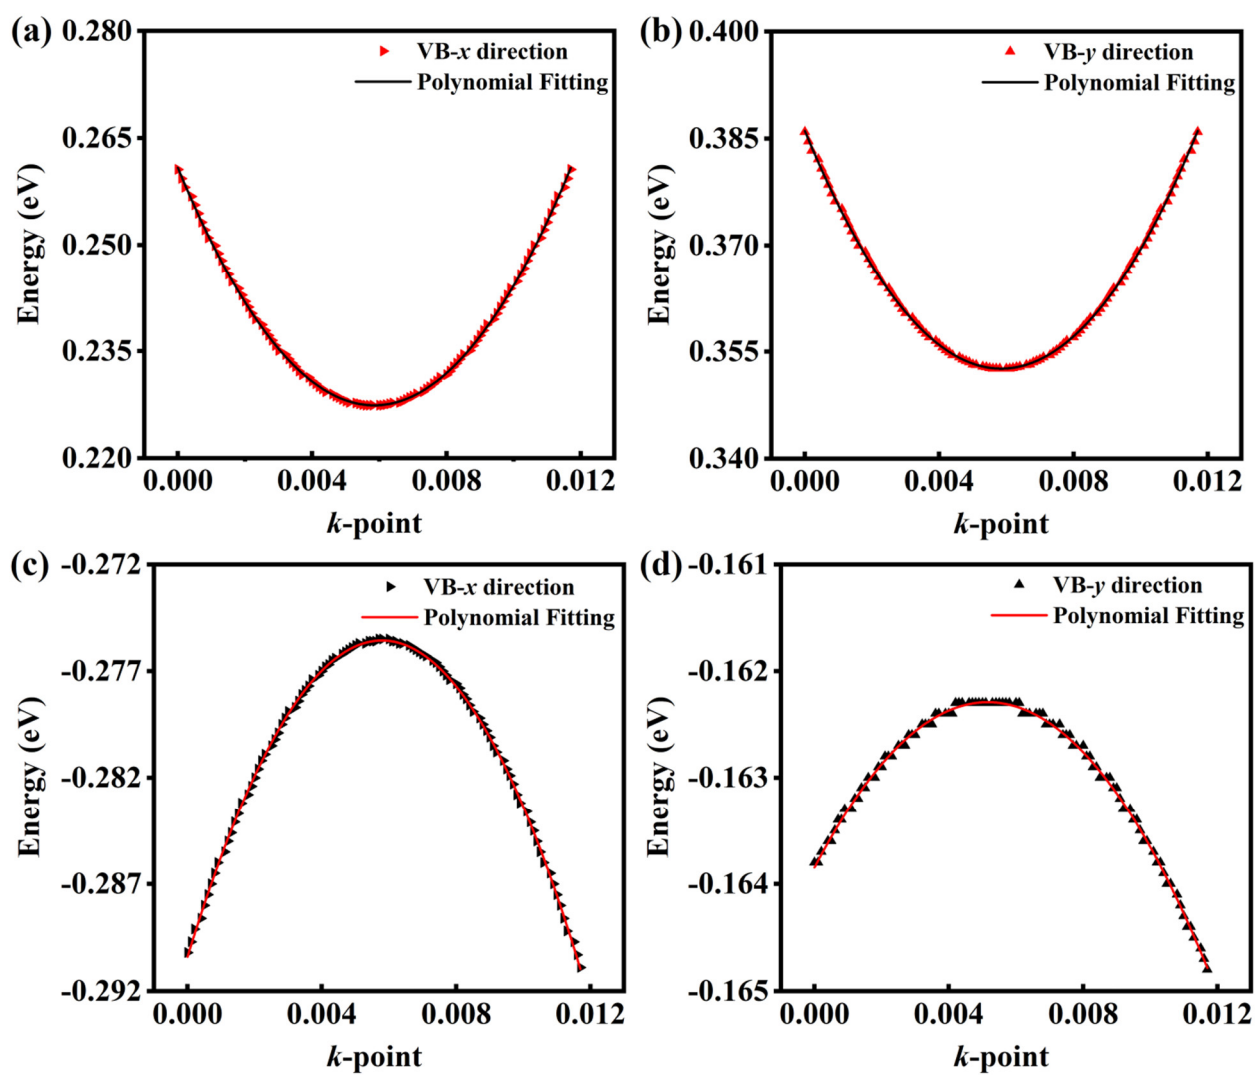

**Figure S15.** The quadratic fitting between the energy near the CBM (VBM) and k-point along the x and y directions under the biaxial strain of 0%.

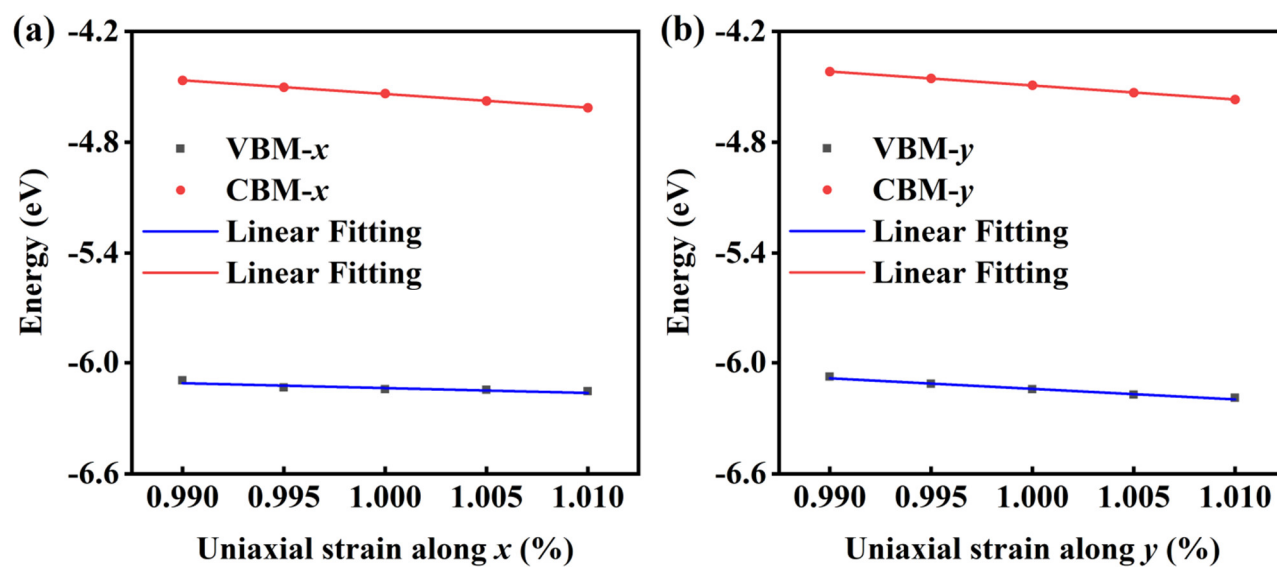

**Figure S16.** The linear fitting for the deformation potential constants along the x and y directions of single-layer GaInSe<sub>3</sub> under the biaxial strain of 0%.

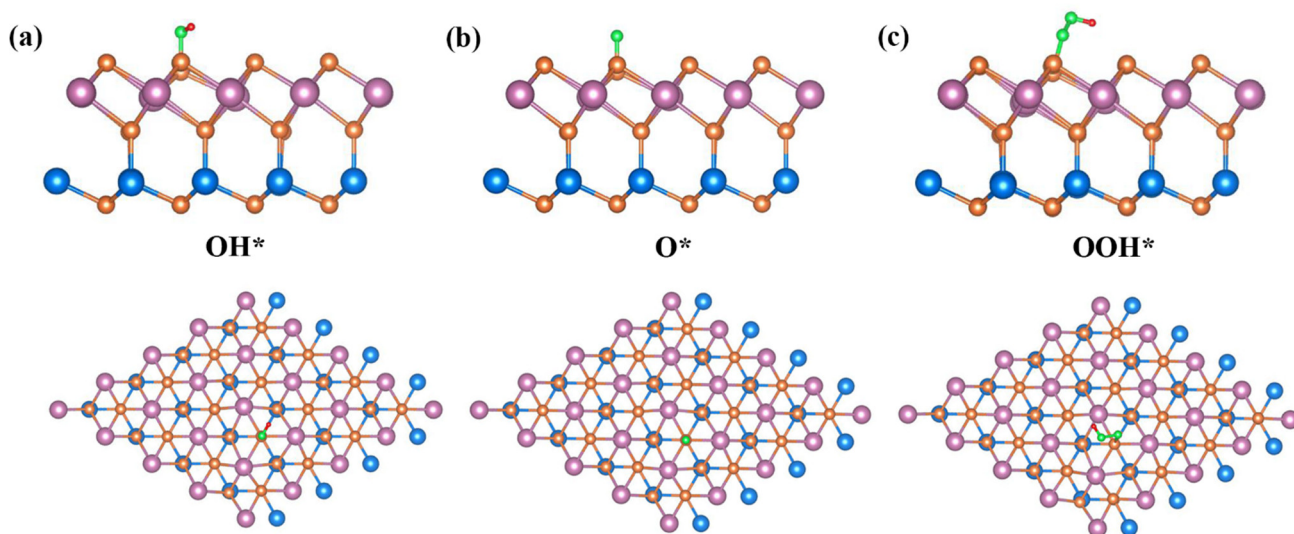

**Figure S17.** The side and top configurations of (a) OH\*, (b) O\*, and (c) OOH\* intermediates of unstrained single-layer GaInSe<sub>3</sub> with a 4×4×1 supercell

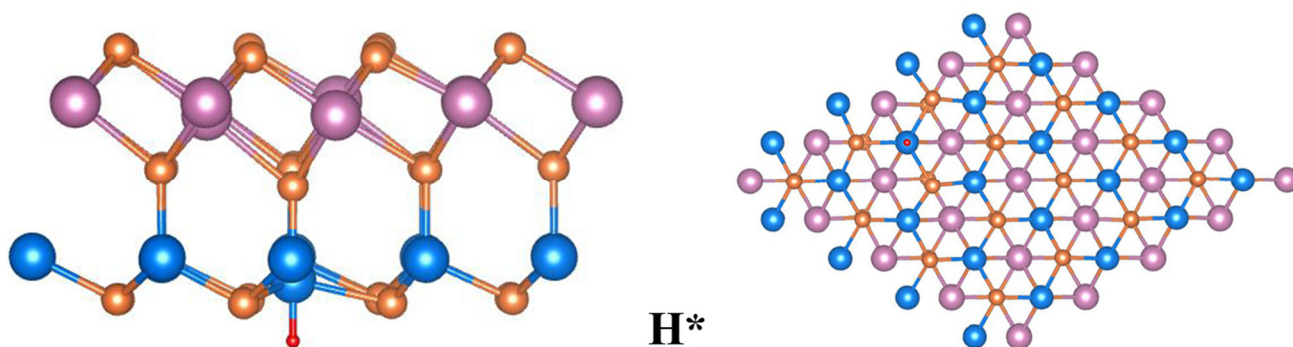

**Figure S18.** The side (Left) and top (Right) configuration of the H\* intermediate of unstrained single-layer GaInSe<sub>3</sub> with a 4×4×1 supercell.

**Table S1.** The in-plane lattice constants  $a$  (Å), vacuum level difference between top and bottom surfaces  $\Delta\Phi$  (eV), higher vacuum level  $\Phi_h$  (eV), and lower vacuum level  $\Phi_l$  (eV) of single-layer GaInSe<sub>3</sub>.

| Strain | $a$  | $\Delta\Phi$ | $\Phi_h$ | $\Phi_l$ |
|--------|------|--------------|----------|----------|
| -2%    | 3.87 | 1.52         | 3.59     | 2.07     |
| -1%    | 3.91 | 1.48         | 3.52     | 2.04     |
| 0%     | 3.95 | 1.44         | 3.46     | 2.02     |
| +1%    | 3.99 | 1.42         | 3.39     | 1.97     |
| +2%    | 4.03 | 1.36         | 3.33     | 1.97     |

**Table S2.** The calculated elastic constants  $C_{11}$ ,  $C_{12}$ , and  $C_{66}$  (N/m) of single-layer GaInSe<sub>3</sub> under different biaxial strains.

| Strain | $C_{11}=C_{22}$ | $C_{12}=C_{21}$ | $C_{66}$ |
|--------|-----------------|-----------------|----------|
| -2%    | 85.61           | 29.70           | 27.96    |
| -1%    | 82.13           | 27.62           | 27.25    |
| 0%     | 78.36           | 25.80           | 26.28    |
| +1%    | 74.17           | 24.27           | 24.95    |
| +2%    | 69.56           | 22.87           | 23.35    |

**Table S3.** The DFT energy ( $E$ ), zero-point energy correction ( $E_{ZPE}$ ), entropy contribution ( $TS$ , T=300 K), and Gibbs Free Energy ( $G$ ) of single-layer GaInSe<sub>3</sub>.

| Species          | $E$ (eV) | $ZPE$ (eV) | $TS$ (eV) | $G$ (eV) |
|------------------|----------|------------|-----------|----------|
| OH*              | -318.615 | 2.412      | 9.323     | -325.526 |
| O*               | -313.664 | 2.056      | 9.074     | -320.682 |
| OOH*             | -322.795 | 2.547      | 9.237     | -329.485 |
| H <sub>2</sub> O | -14.424  | 0.566      | 0.675     | -14.533  |
| H <sub>2</sub>   | -6.805   | 0.265      | 0.405     | -6.945   |
| *                | -310.985 | 1.708      | 7.394     | -316.671 |
| H*               | -310.934 | 2.253      | 9.021     | -317.701 |
